# Supplementary material for: Longitudinal Analysis of SARS-CoV-2-Specific Cellular and Humoral Immune Responses and Breakthrough Infection following BNT162b2/BNT162b2/BNT162b2 and ChAdOx1/ChAdOx1/BNT162b2 Vaccination: A Prospective Cohort in Naive Healthcare Workers
Source: MDPI journal article supplement (doi:10.3390/vaccines11101613), 2023-10-19
Supplement: s1 [file s1]

## Supplementary Materials

**Table S1.** Mutations in spike protein of the B.1.1.529/BA.1 BA.2 and BA. 5 lineages (Omicron variant) compared to the Wuhan variant.

| Wuhan Wild-Type   |            | Omicron Variants |                |                |
|-------------------|------------|------------------|----------------|----------------|
| Sequence position | Amino acid | B.1.1.529/BA.1   | B.1.1.529/BA.2 | B.1.1.529/BA.5 |
| 19                | T19        |                  | T19I           | T19I           |
| 24                | L24        |                  | L24deletion    | L24deletion    |
| 25                | P25        |                  | P25deletion    | P25deletion    |
| 26                | P26        |                  | P26deletion    | P26deletion    |
| 27                | A27        |                  | A27S           | A27S           |
| 67                | A67        | A67V             |                |                |
| 69                | H69        | H69deletion      |                | H69deletion    |
| 70                | V70        | V70deletion      |                | V70deletion    |
| 95                | T95        | T95I             |                |                |
| 142               | G142       | G142D            | G142D          | G142D          |
| 143               | V143       | V143deletion     |                |                |
| 144               | Y144       | Y144deletion     |                |                |
| 145               | Y145       | Y145deletion     |                |                |
| 211               | N211       | N211deletion     |                |                |
| 212               | L212       | L212I            |                |                |
| 213               | V213       |                  | V213G          | V213G          |
| 214               |            | Insertion214EPE  |                |                |
| 339               | G339       | G339D            | G339D          | G339D          |
| 371               | S371       | S371L            | S371F          | S371F          |
| 373               | S373       | S373P            | S373P          | S373P          |
| 375               | S375       | S375F            | S375F          | S375F          |
| 376               | T376       |                  | T376A          | T376A          |
| 405               | D405       |                  | D405N          | D405N          |
| 408               | R408       |                  | R408S          | R408S          |
| 417               | K417       | K417N            | K417N          | K417N          |
| 440               | N440       | N440K            | N440K          | N440K          |
| 446               | G446       | G446S            |                |                |
| 452               |            |                  |                | L452R          |
| 477               | S477       | S477N            | S477N          | S477N          |
| 478               | T478       | T478K            | T478K          | T478K          |
| 484               | E484       | E484A            | E484A          | E484A          |
| 486               |            |                  |                | F486V          |
| 493               | Q493       | Q493R            | Q493R          |                |
| 496               | G496       | G496S            |                |                |
| 498               | Q498       | Q498R            | Q498R          | Q498R          |
| 501               | N501       | N501Y            | N501Y          | N501Y          |
| 505               | Y505       | Y505H            | Y505H          | Y505H          |
| 547               | T547       | T547K            |                |                |
| 614               | D614       | D614G            | D614G          | D614G          |
| 655               | H655       | H655Y            | H655Y          | H655Y          |
| 679               | N679       | N679K            | N679K          | N679K          |
| 681               | P681       | P681H            | P681H          | P681H          |
| 764               | N764       | N764K            | N764K          | N764K          |
| 796               | D796       | D796Y            | D796Y          | D796Y          |
| 856               | N856       | N856K            |                |                |
| 954               | Q954       | Q954H            | Q954H          | Q954H          |
| 969               | N969       | N969K            | N969K          | N969K          |
| 981               | L981       | L981F            |                |                |

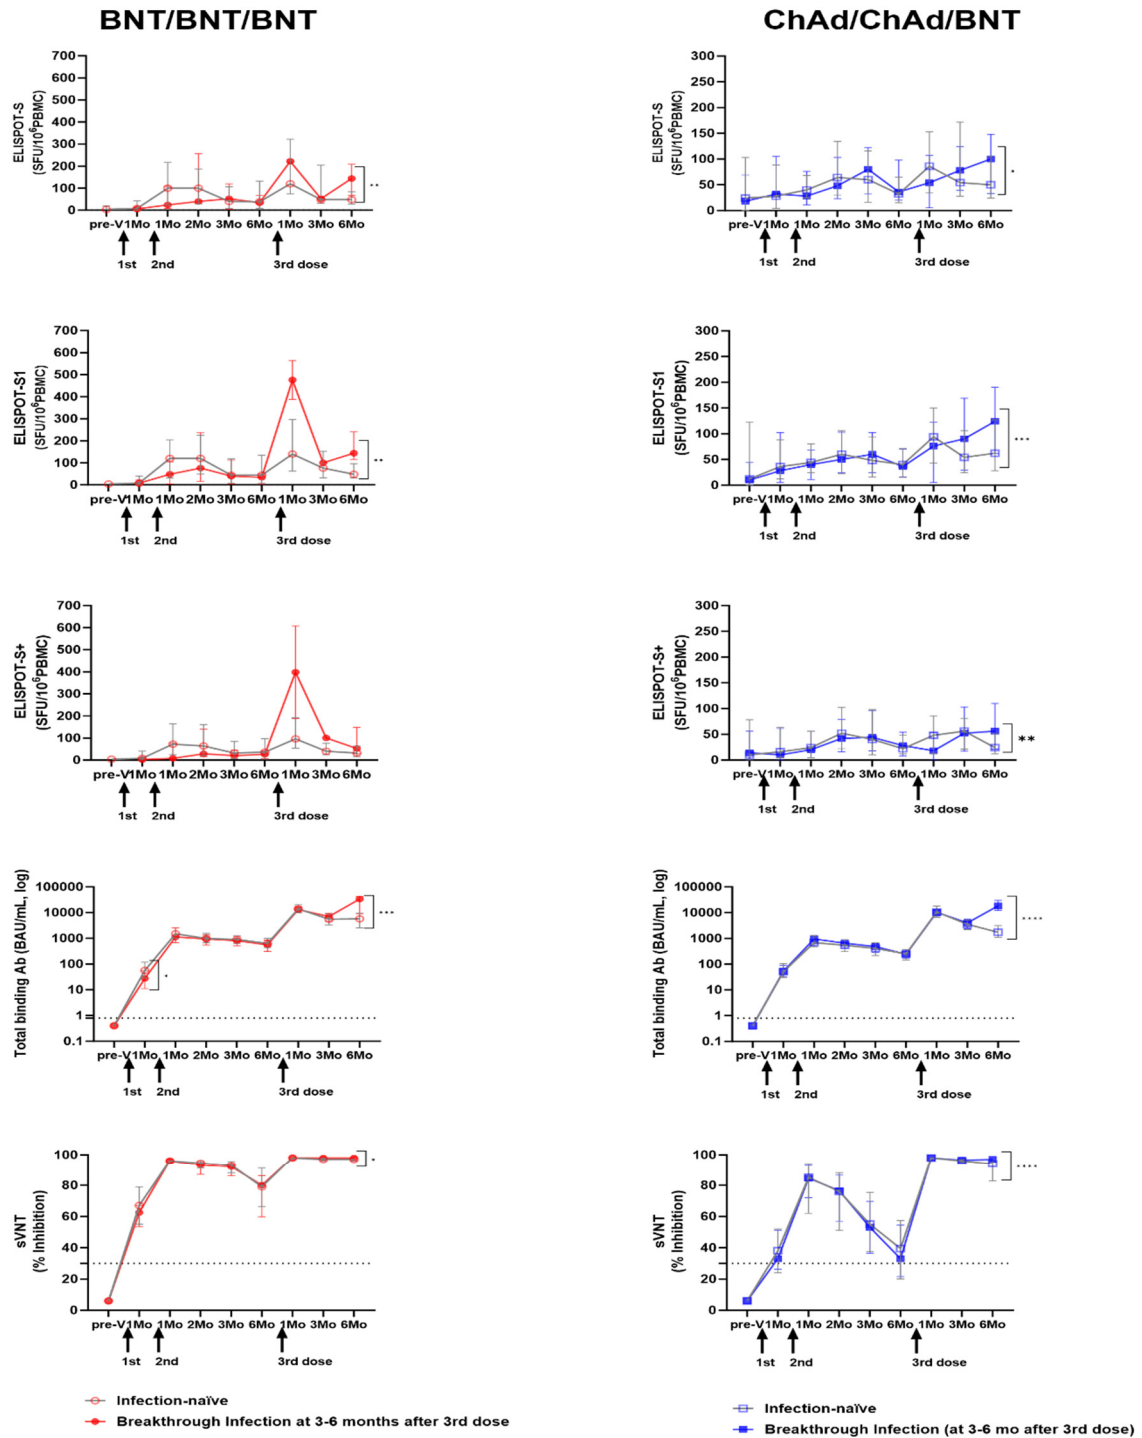

**Figure S1.** Comparison of longitudinal immune responses between infection-naïve and breakthrough infection participants. ELISPOT results for S, S1 and S+ peptides and humoral response measured by total binding antibody and neutralizing activity levels, up to 6 months after the 3rd dose in the BNT group (A) and the ChAd group (B). Within each group, the immune response was compared between infection-naïve participants and those who developed breakthrough infections 3 to 6 months after the third dose.

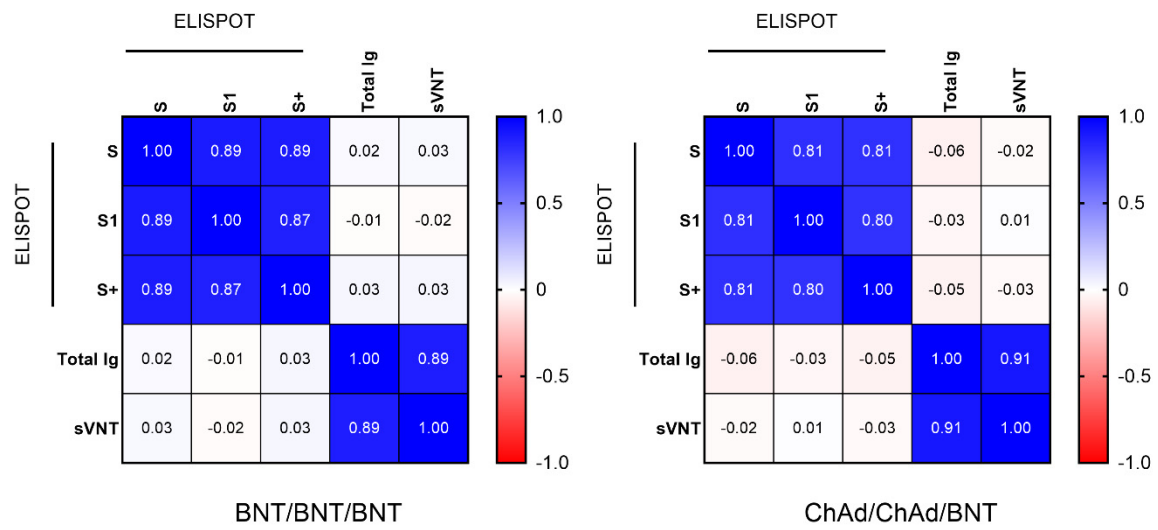

**Figure S2.** Correlation between SARS-CoV-2-Spike specific cellular response measured by ELISPOT, and humoral responses assessed by total immunoglobulin and neutralizing antibody assay (sVNT) in the BNT/BNT/BNT (A) and the ChAd/ChAd/BNT (B) groups.

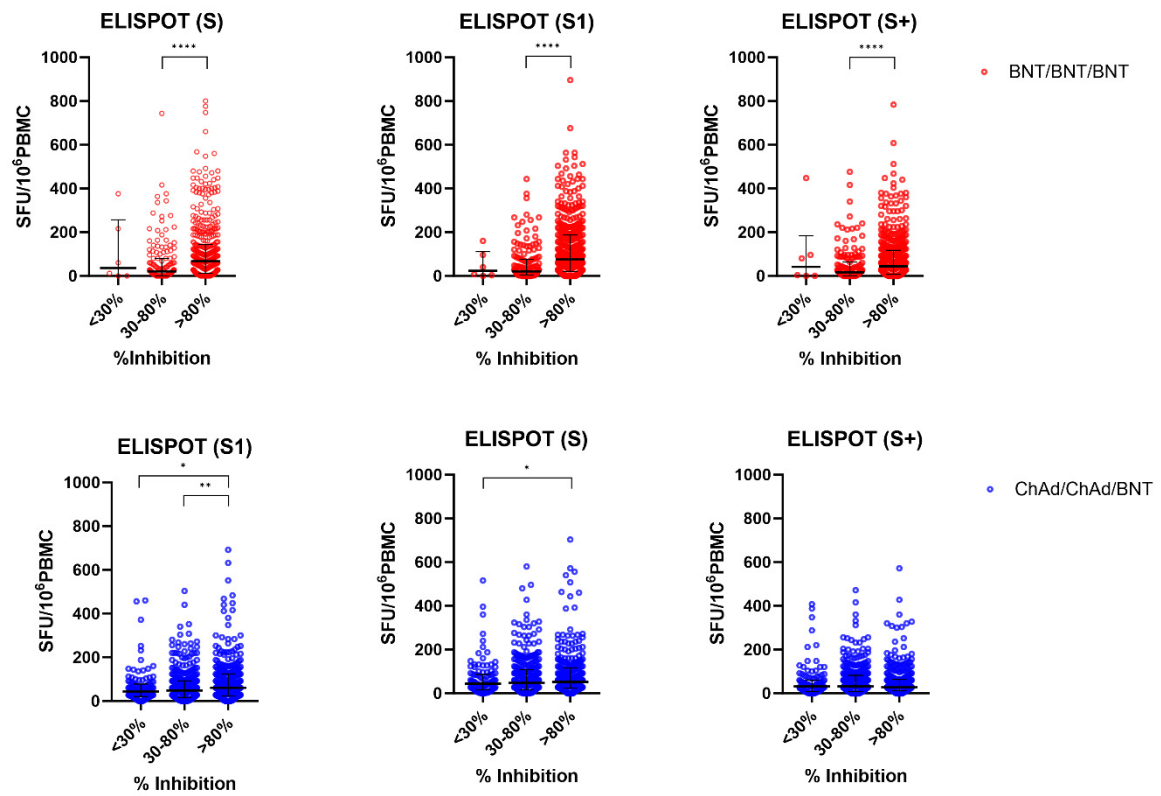

**Figure S3.** Comparison of ELISPOT results according to the classified sVNT results into three grades (strong: >80%, moderate: 30–80%, weak: <30%).
